# Supplementary material for: Molecular engineering of BODIPY-bridged fluorescent probes for lysosome imaging – a computational study
Source: Royal Society of Chemistry journal article supplement (doi:10.1039/d4cp02570a), 2024-01-01
Supplement: d4cp02570a1.pdf [file d4cp02570a1.pdf]

### Supplementary Information

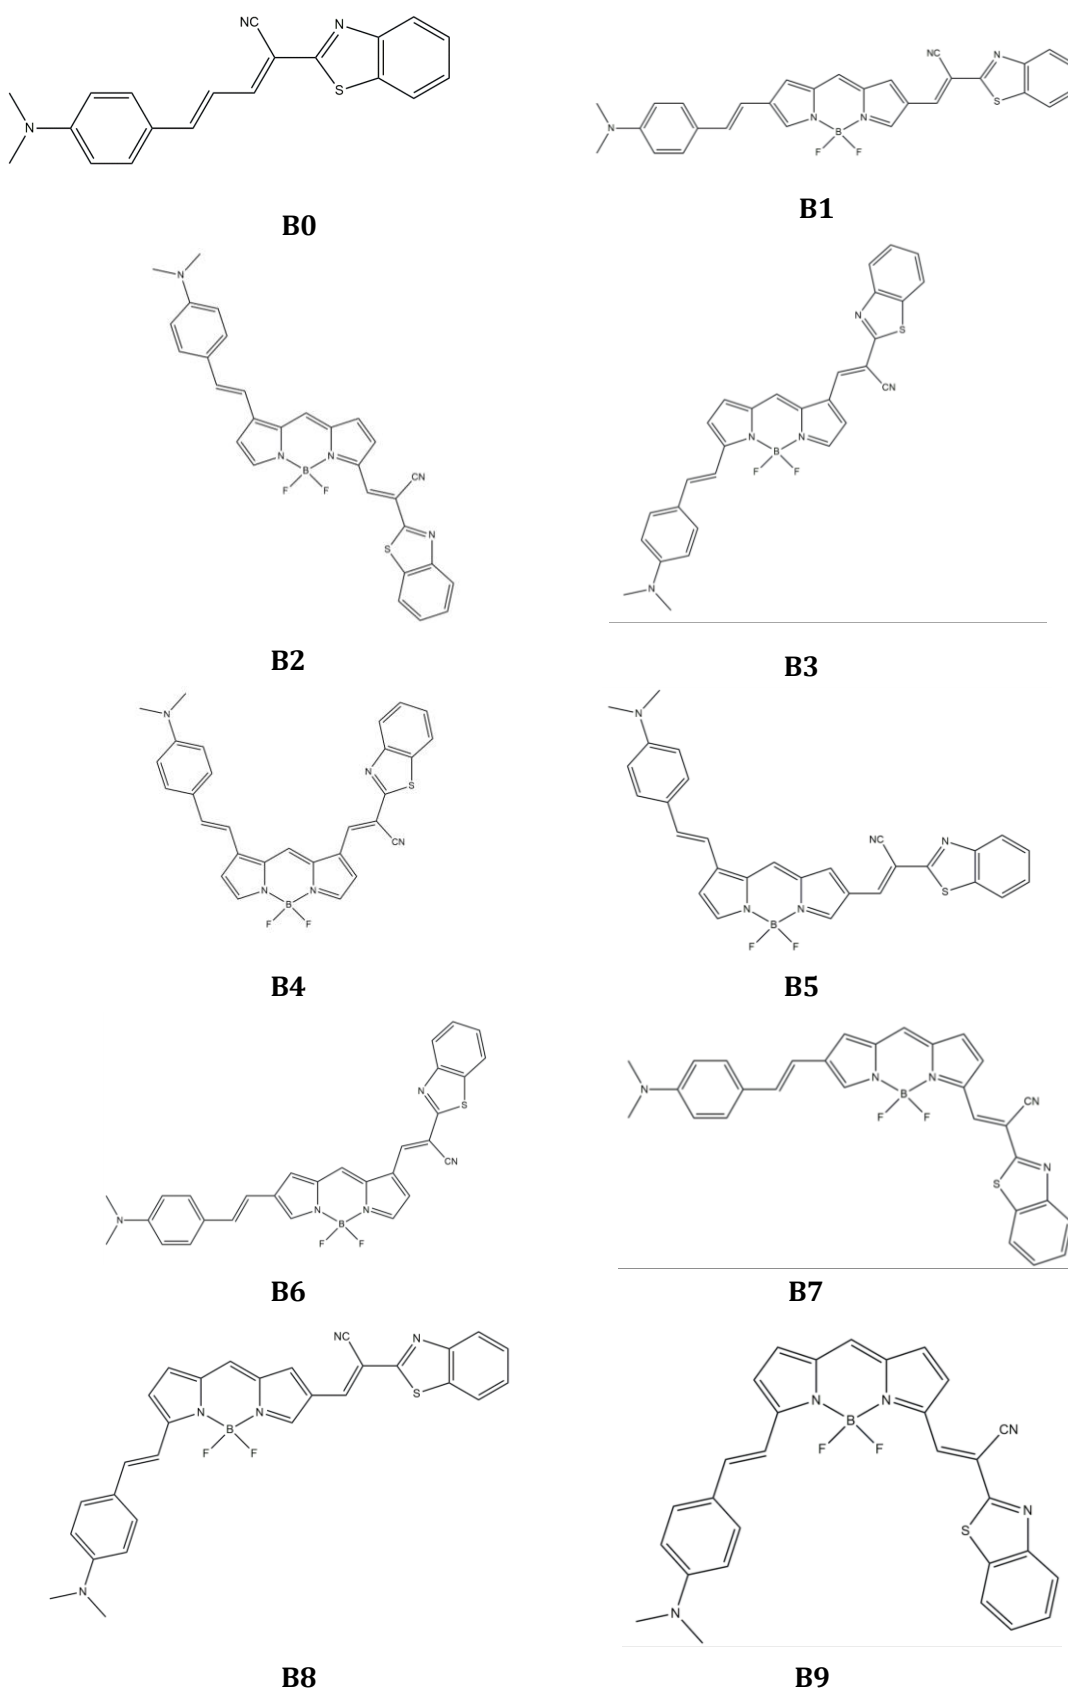

**Figure S1.** 2D structural representation of B0 and designed B derivatives

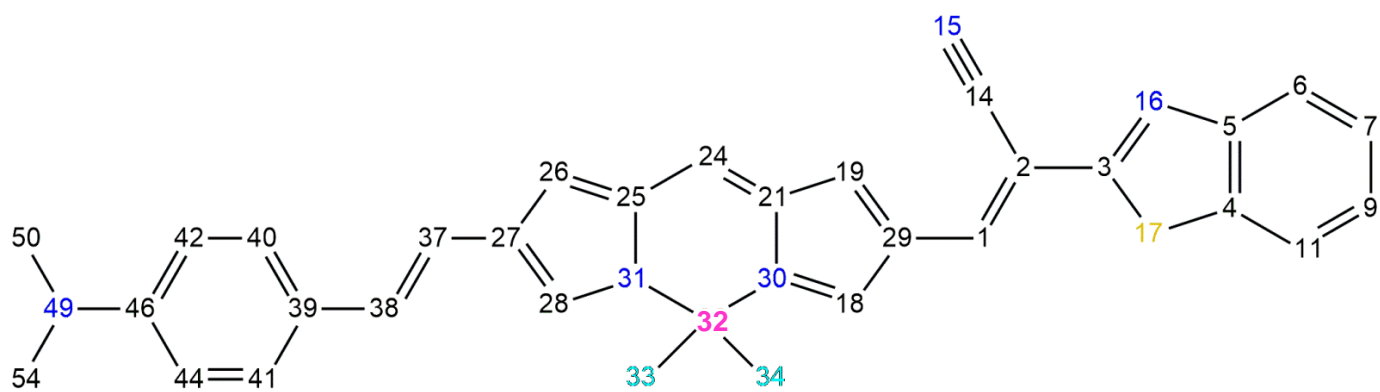

**Figure S2.** Atom numbering followed in this study.

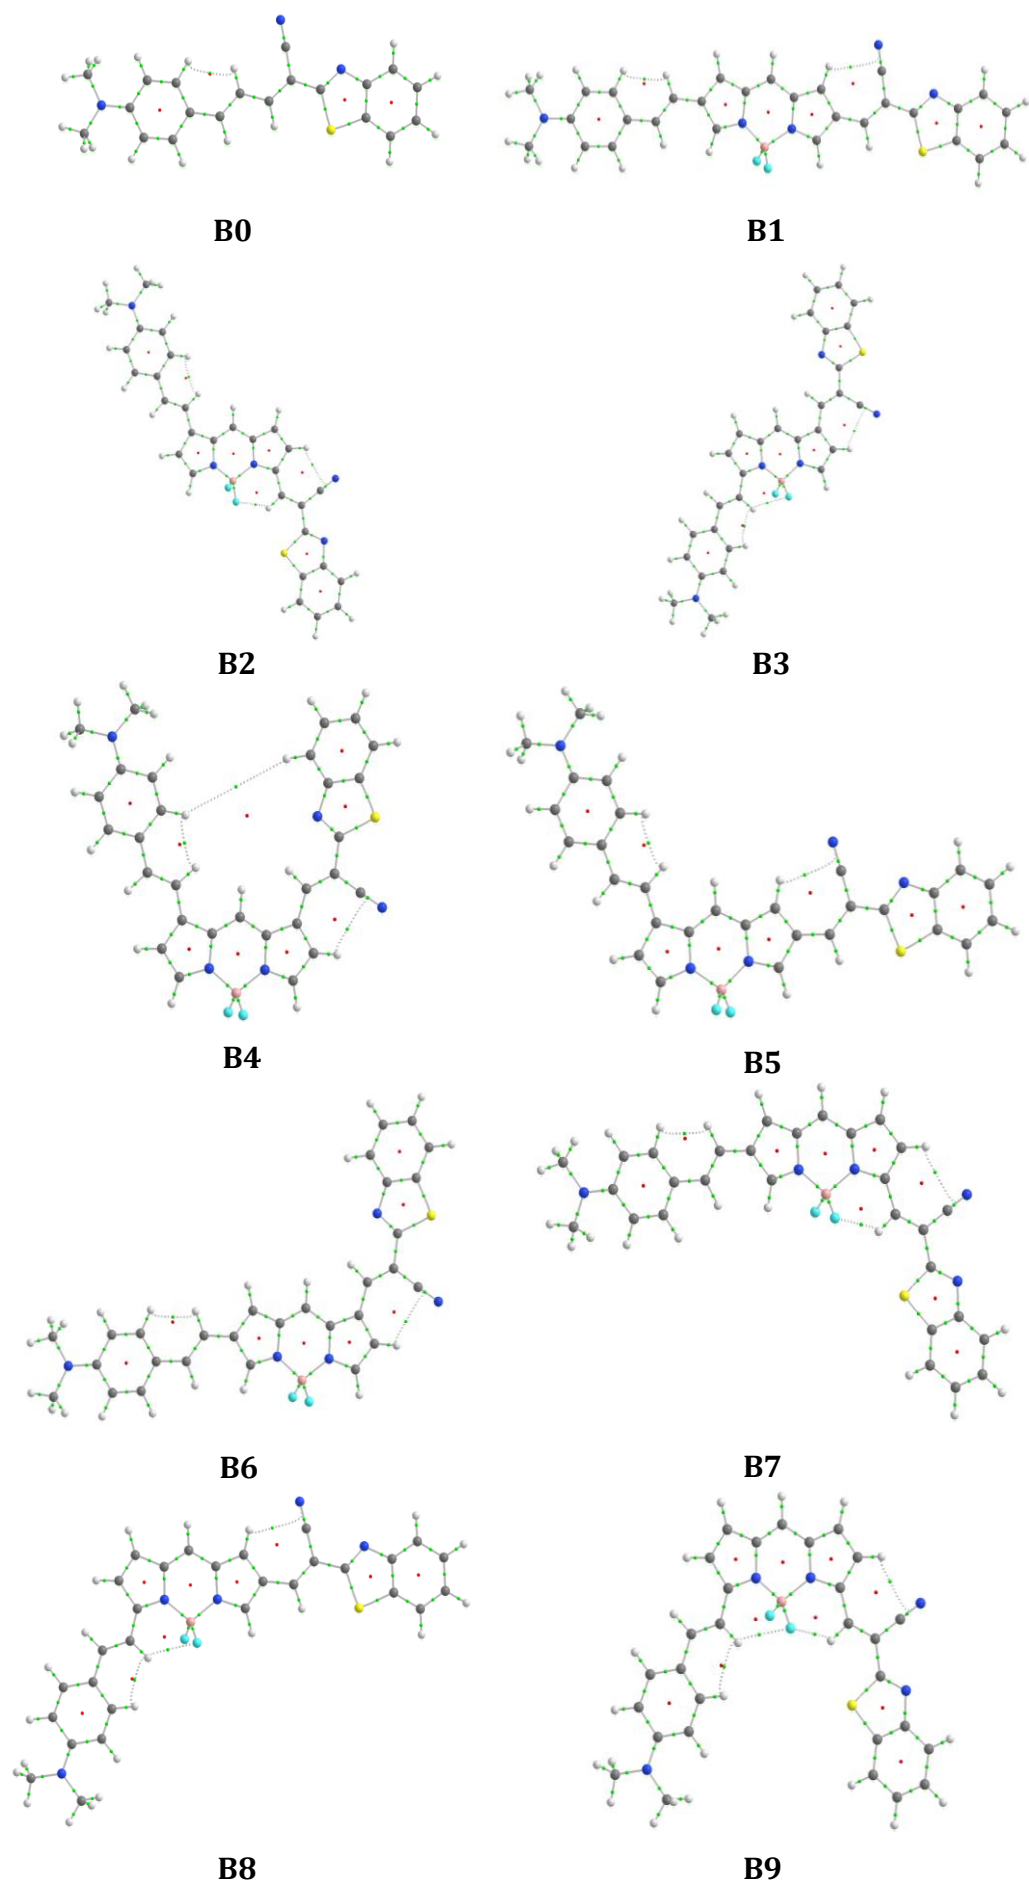

**Figure S3.** Molecular graphs of B0 and designed B derivatives.

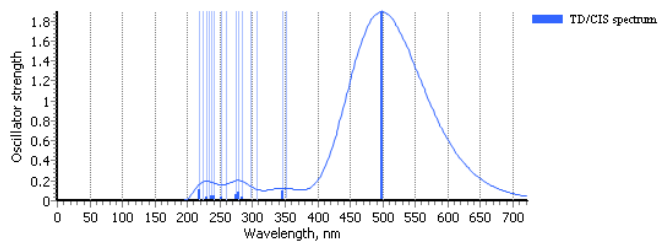

**B0**

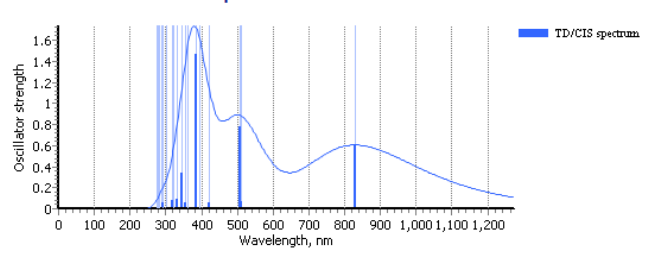

**B1**

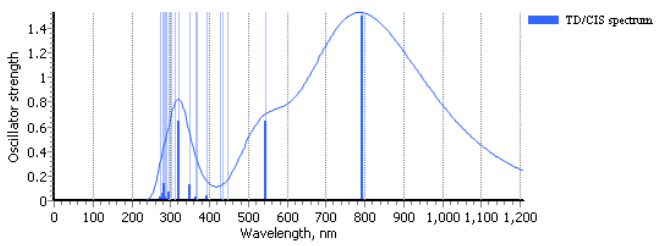

**B2**

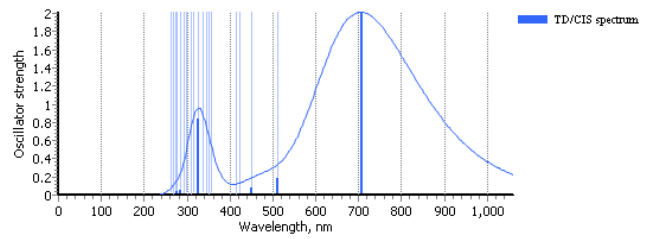

**B3**

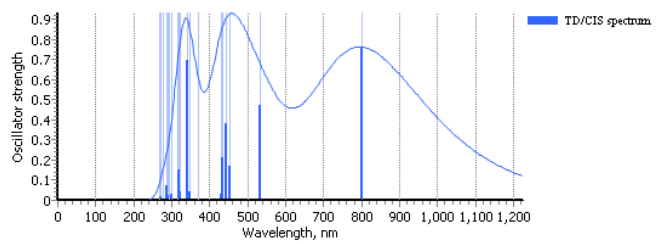

**B4**

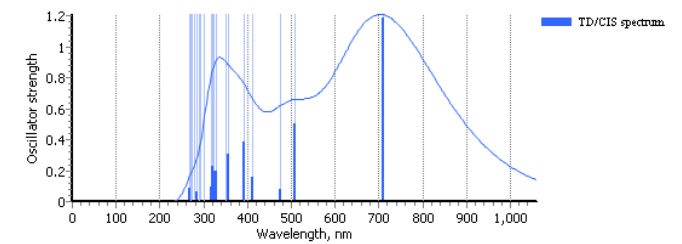

**B5**

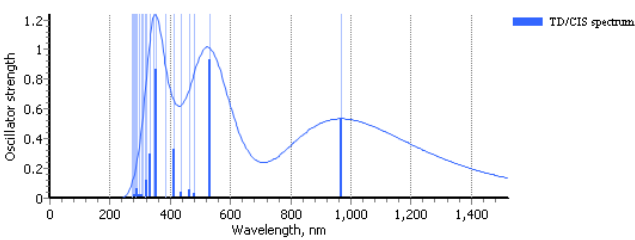

**B6**

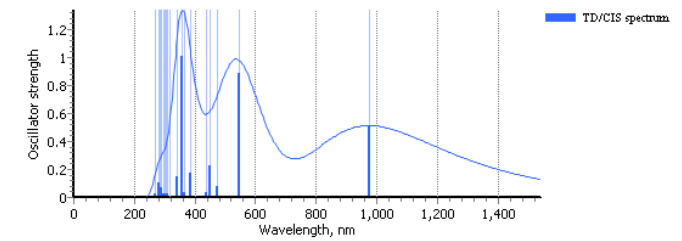

**B7**

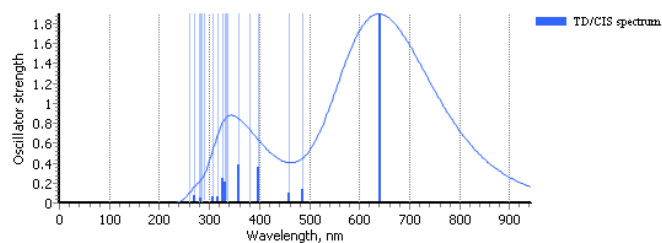

**B8**

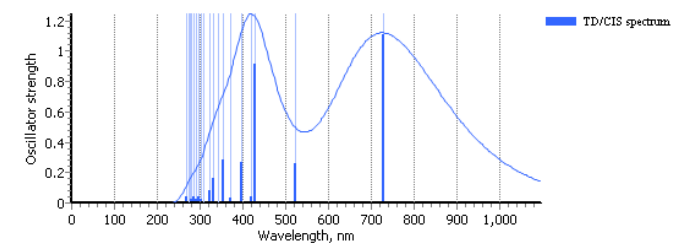

**B9**

**Figure S4.** Simulated absorption Spectra of B0 and designed B derivatives at B3PW91/6-31g(d,p) level of theory.

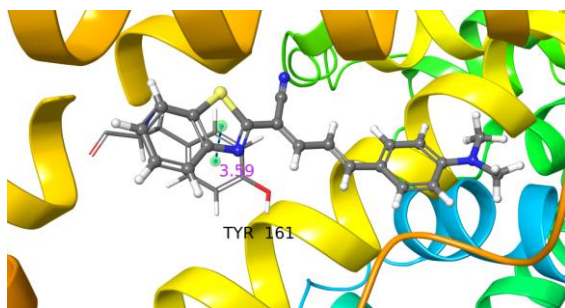

**B0**

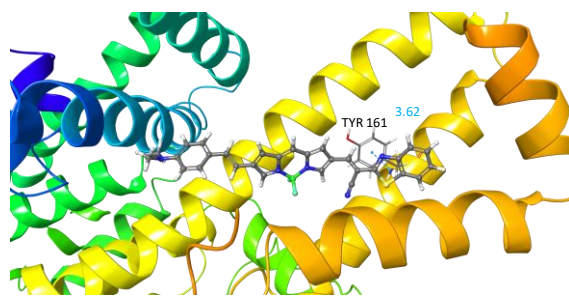

**B1**

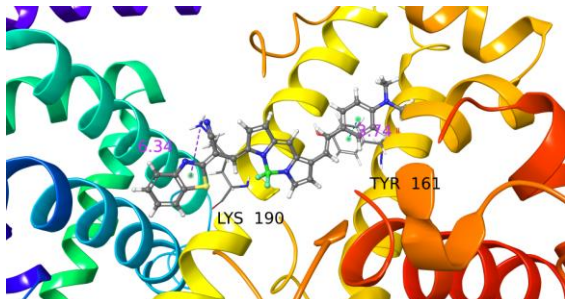

**B2**

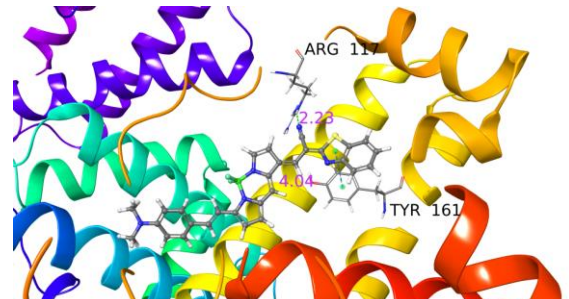

**B3**

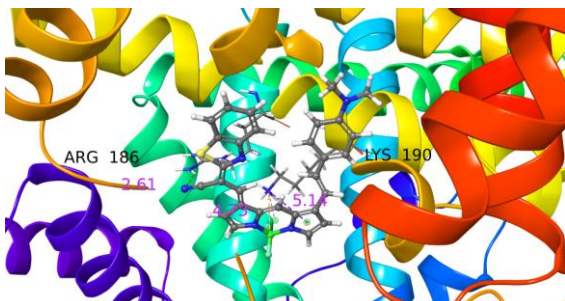

**B4**

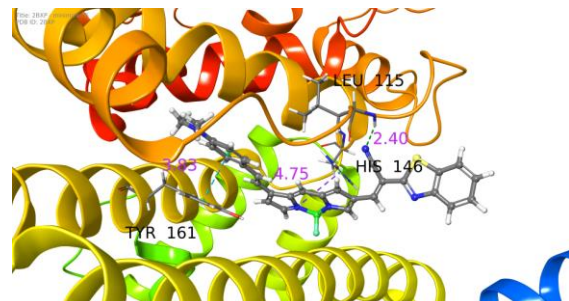

**B5**

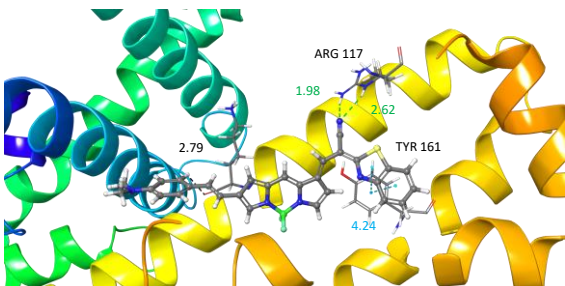

**B6**

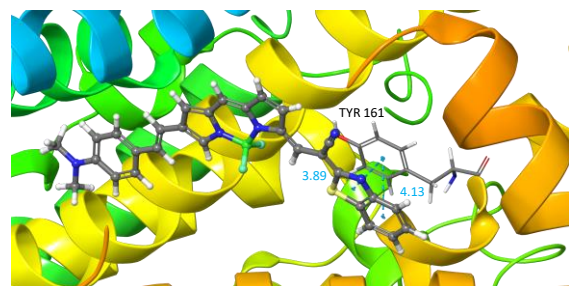

**B7**

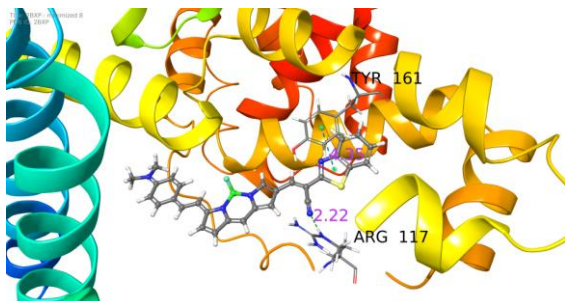

**B8**

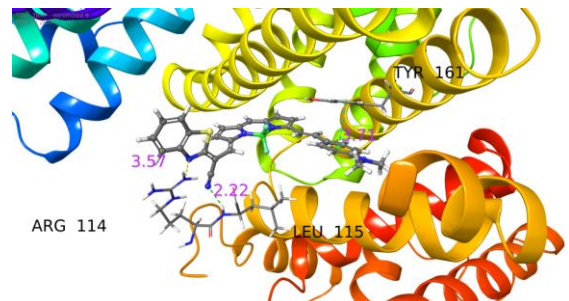

**B9**

**Figure S5.** 3D representations of the interactions observed in B0 and designed B derivatives.

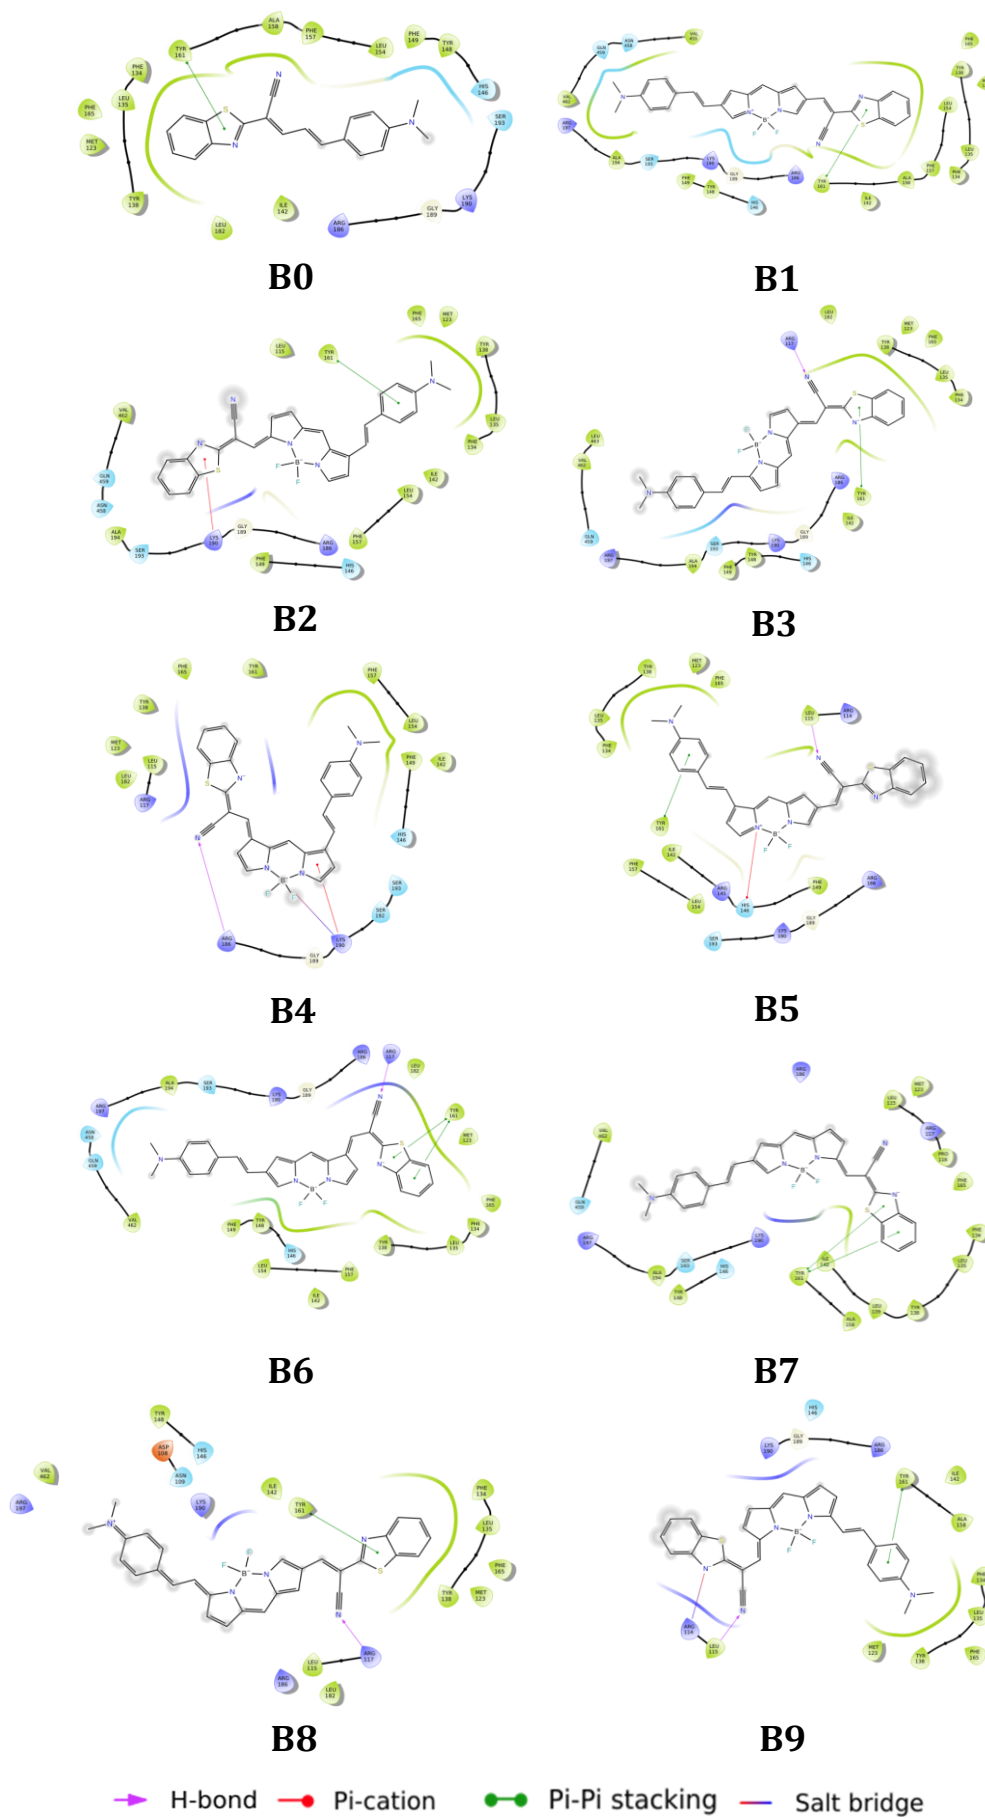

**Figure S6.** 2D representations of the interactions observed in B0 and designed B derivatives.

**Table S1.** Selected bond parameters for the molecules obtained from optimized geometries for B0 and designed B derivatives at B3PW91/6-31g(d,p) level of theory.

| Bond Parameters   |                 | Molecules  |        |        |        |            |            |            |            |            |        |
|-------------------|-----------------|------------|--------|--------|--------|------------|------------|------------|------------|------------|--------|
|                   |                 | B0         | B1     | B2     | B3     | B4         | B5         | B6         | B7         | B8         | B9     |
| Bond Length(Å)    | C39-C38         | 1.434      | 1.452  | 1.437  | 1.432  | 1.437      | 1.439      | 1.451      | 1.451      | 1.435      | 1.432  |
|                   | C38-C37         | 1.371      | 1.355  | 1.366  | 1.369  | 1.366      | 1.365      | 1.355      | 1.356      | 1.367      | 1.370  |
|                   | C37-C27         | -          | 1.445  | 1.426  | 1.420  | 1.426      | 1.428      | 1.444      | 1.444      | 1.423      | 1.420  |
|                   | 1C-29C          | -          | 1.431  | 1.425  | 1.422  | 1.424      | 1.429      | 1.426      | 1.427      | 1.428      | 1.422  |
|                   | 1C-2C           | 1.379      | 1.368  | 1.371  | 1.374  | 1.372      | 1.369      | 1.370      | 1.370      | 1.370      | 1.374  |
|                   | 2C-14C          | 1.426      | 1.428  | 1.428  | 1.424  | 1.424      | 1.428      | 1.425      | 1.429      | 1.427      | 1.427  |
|                   | 37C-1C          | 1.414      | -      | -      | -      | -          | -          | -          | -          | -          | -      |
|                   | 2C-3C           | 1.452      | 1.460  | 1.458  | 1.462  | 1.463      | 1.460      | 1.464      | 1.459      | 1.459      | 1.457  |
| Bond Angle(°)     | 1C-2C-3C        | 124.3      | 114.8  | 123.0  | 120.3  | 120.3      | 123.5      | 120.3      | 122.9      | 123.5      | 122.9  |
|                   | 14C-2C-3C       | 115.8      | 105.5  | 114.5  | 117.0  | 117.0      | 114.9      | 117.0      | 114.5      | 114.8      | 114.5  |
|                   | 39C-38C-37C     | 128.1      | 127.5  | 127.7  | 127.3  | 127.5      | 127.6      | 127.4      | 127.5      | 127.3      | 127.3  |
|                   | 37C-1C-2C       | 126.5      | -      | -      | -      | -          | -          | -          | -          | -          | -      |
|                   | 29C-1C-2C       | -          | 129.8  | 129.3  | 129.8  | 129.7      | 129.9      | 129.6      | 129.2      | 130.0      | 129.5  |
| Dihedral Angle(°) | 39C-38C-37C-1C  | -<br>180.0 | -      | -      | -      | -          | -          | -          | -          | -          | -      |
|                   | 38C-37C-1C-2C   | 180.0      | -      | -      | -      | -          | -          | -          | -          | -          | -      |
|                   | 38C-37C-28C-31C | -          | -179.7 | 179.4  | 176.3  | 178.7      | 179.7      | 180.0      | -<br>178.1 | -<br>176.0 | 176.3  |
|                   | 30C-18C-1C-2C   | -          | -      | -173.6 | 180.0  | -<br>179.7 | 179.7      | -<br>180.0 | 173.7      | -<br>179.9 | -175.1 |
|                   | 41C-39C-38C-37C | 180.0      | -179.5 | -179.8 | -179.8 | 179.0      | 179.2      | 180.0      | -<br>179.0 | 179.8      | 179.8  |
|                   | 39C-38C-37C-27C | -          | 179.9  | 179.6  | -179.9 | 179.7      | -<br>179.8 | -<br>180.0 | -<br>179.9 | -<br>179.9 | 179.8  |

**Table S2.** FMO Energies of B0 and designed B derivatives from HOMO-2 to LUMO+2 along with HOMO-LUMO energy gap B3PW91/6-31g(d,p) level of theory.

| FMO values (in eV) |        |        |        |        |        |        |            |
|--------------------|--------|--------|--------|--------|--------|--------|------------|
| S. No              | HOMO-2 | HOMO-1 | HOMO   | LUMO   | LUMO+1 | LUMO+2 | Energy Gap |
| <b>B0</b>          | -6.652 | -6.394 | -5.262 | -2.611 | -0.799 | -0.387 | 2.651      |
| <b>B1</b>          | -6.512 | -6.036 | -5.015 | -3.263 | -2.337 | -1.223 | 1.752      |
| <b>B2</b>          | -6.712 | -5.974 | -5.185 | -3.465 | -2.168 | -1.095 | 1.720      |
| <b>B3</b>          | -6.433 | -6.049 | -5.235 | -3.358 | -2.085 | -1.241 | 1.877      |
| <b>B4</b>          | -6.081 | -6.081 | -5.198 | -3.461 | -2.123 | -1.106 | 1.737      |
| <b>B5</b>          | -6.577 | -6.018 | -5.185 | -3.236 | -2.310 | -1.121 | 1.949      |
| <b>B6</b>          | -6.457 | -6.094 | -5.020 | -3.513 | -2.080 | -1.239 | 1.507      |
| <b>B7</b>          | -6.649 | -5.984 | -5.017 | -3.518 | -2.130 | -1.243 | 1.499      |
| <b>B8</b>          | -6.505 | -5.992 | -5.225 | -3.130 | -2.276 | -1.276 | 2.096      |
| <b>B9</b>          | -6.706 | -5.974 | -5.209 | -3.359 | -2.133 | -1.251 | 1.850      |



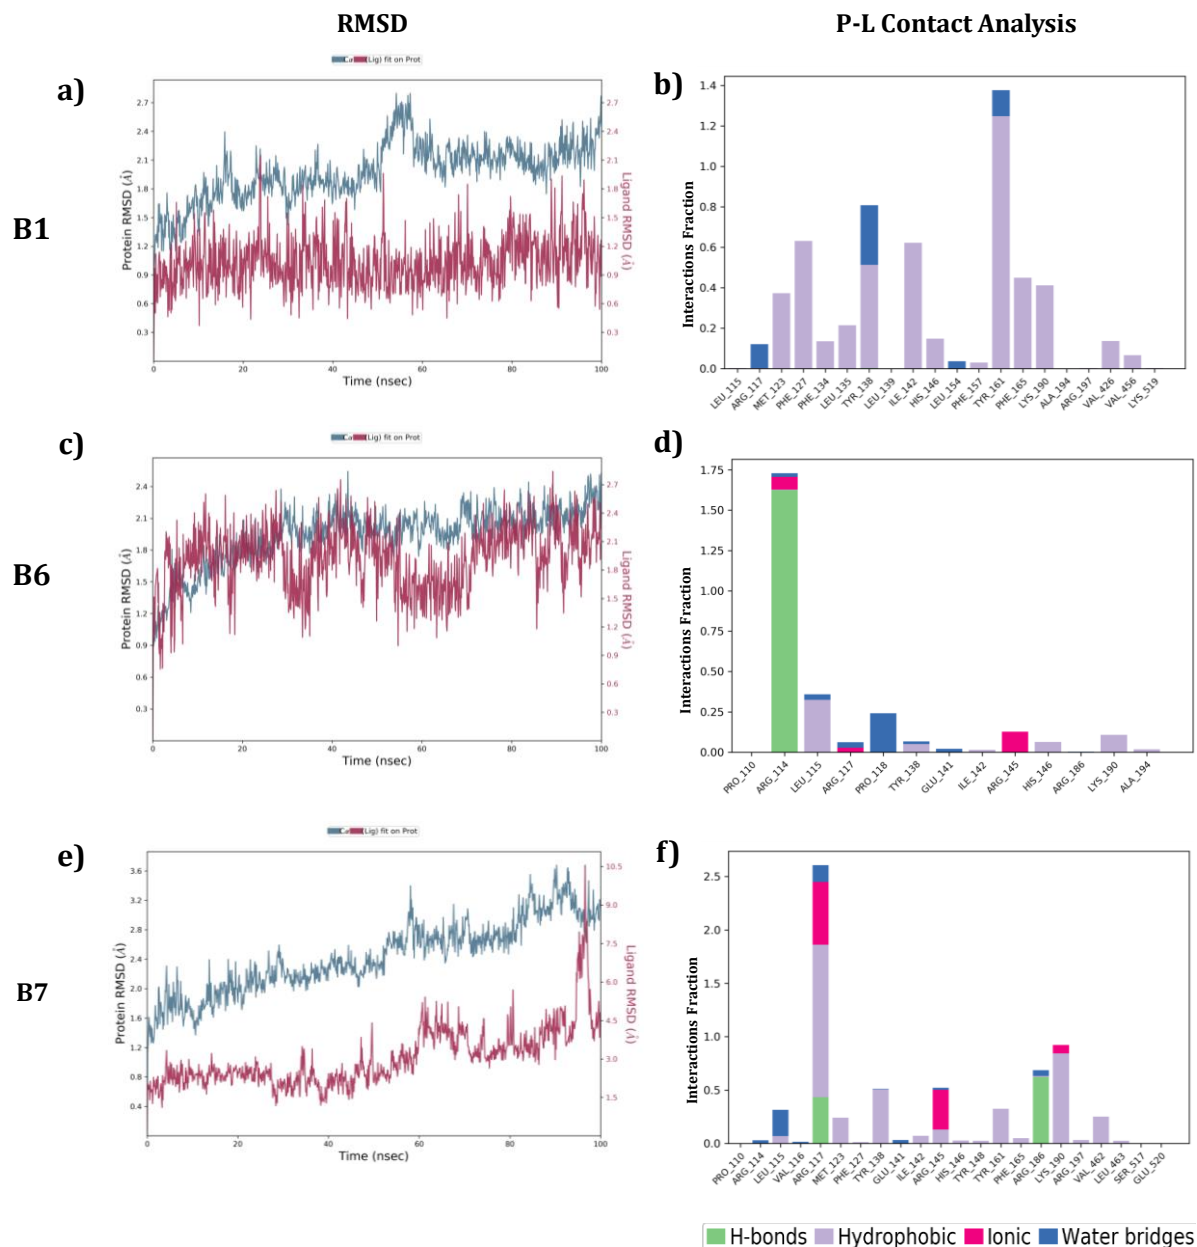

**Figure S7.** Extended 100 ns plots for MD analysis. (Left) RMSD plots for B1, B6 and B7 with HSA. The blue colour represents the evolution of the backbone C $\alpha$  atoms of the protein, whereas the red colour indicates the molecule's heavy atoms. (Right) Protein–ligand contacts for the top three B derivatives with HSA.

**3D Coordinates of Optimized geometries of B0 and B derivatives at B3PW91/6-31g(d,p) level of theory.**

**B0**

Center Atomic Atomic Coordinates (Angstroms)

| Number | Number | Type | X         | Y         | Z         |
|--------|--------|------|-----------|-----------|-----------|
| 1      | 6      | 0    | -1.610348 | 0.151175  | 2.165316  |
| 2      | 6      | 0    | -0.255364 | 0.427571  | 2.392784  |
| 3      | 6      | 0    | 0.395201  | 1.412864  | 1.637871  |
| 4      | 6      | 0    | -0.309199 | 2.121698  | 0.655255  |
| 5      | 6      | 0    | -1.664283 | 1.845415  | 0.427932  |
| 6      | 6      | 0    | -2.314894 | 0.860284  | 1.183178  |
| 7      | 1      | 0    | -2.106969 | -0.601217 | 2.741673  |
| 8      | 1      | 0    | 0.282515  | -0.113538 | 3.142886  |
| 9      | 1      | 0    | 0.187578  | 2.873689  | 0.078589  |
| 10     | 1      | 0    | -2.202185 | 2.386491  | -0.322232 |
| 11     | 6      | 0    | 1.884146  | 1.716433  | 1.888412  |
| 12     | 6      | 0    | 2.513933  | 2.669791  | 1.159482  |
| 13     | 6      | 0    | 4.002775  | 2.972864  | 1.411008  |
| 14     | 6      | 0    | 4.632828  | 3.927143  | 0.683726  |
| 15     | 6      | 0    | 6.121568  | 4.229541  | 0.936358  |
| 16     | 6      | 0    | 8.392656  | 4.578596  | 1.955926  |
| 17     | 6      | 0    | 8.137356  | 5.374624  | 0.910530  |
| 18     | 6      | 0    | 9.161298  | 6.427837  | 0.468773  |
| 19     | 6      | 0    | 10.306269 | 6.571597  | 1.195127  |
| 20     | 1      | 0    | 11.033141 | 7.300425  | 0.903015  |
| 21     | 6      | 0    | 10.560668 | 5.686247  | 2.446576  |
| 22     | 1      | 0    | 11.452532 | 5.820093  | 3.022572  |

|    |    |   |           |           |           |
|----|----|---|-----------|-----------|-----------|
| 23 | 6  | 0 | 9.653510  | 4.739086  | 2.810418  |
| 24 | 1  | 0 | 9.818875  | 4.120354  | 3.667572  |
| 25 | 1  | 0 | 2.421482  | 1.174425  | 2.638389  |
| 26 | 1  | 0 | 1.976775  | 3.211827  | 0.409513  |
| 27 | 1  | 0 | 4.539973  | 2.429948  | 2.160371  |
| 28 | 1  | 0 | 8.978685  | 7.040280  | -0.389369 |
| 29 | 6  | 0 | 3.860653  | 4.709217  | -0.394695 |
| 30 | 7  | 0 | 3.286057  | 5.292137  | -1.198143 |
| 31 | 7  | 0 | -3.736468 | 0.570729  | 0.945372  |
| 32 | 7  | 0 | 6.806517  | 5.137961  | 0.280125  |
| 33 | 16 | 0 | 7.106586  | 3.399468  | 2.154638  |
| 34 | 6  | 0 | -4.771659 | 1.377271  | 1.607769  |
| 35 | 1  | 0 | -4.794429 | 2.354862  | 1.173377  |
| 36 | 1  | 0 | -5.724928 | 0.908206  | 1.480661  |
| 37 | 1  | 0 | -4.549127 | 1.455819  | 2.651421  |
| 38 | 6  | 0 | -4.122730 | -0.525343 | 0.045191  |
| 39 | 1  | 0 | -4.487422 | -1.349205 | 0.622384  |
| 40 | 1  | 0 | -4.890591 | -0.187571 | -0.619038 |
| 41 | 1  | 0 | -3.271335 | -0.837074 | -0.523008 |

## B1

| Center | Atomic | Atomic | Coordinates (Angstroms) |   |   |
|--------|--------|--------|-------------------------|---|---|
| Number | Number | Type   | X                       | Y | Z |

-----

|   |   |   |           |           |           |
|---|---|---|-----------|-----------|-----------|
| 1 | 6 | 0 | -4.721504 | -0.539542 | 0.190877  |
| 2 | 6 | 0 | -5.570989 | 0.539214  | 0.194892  |
| 3 | 6 | 0 | -7.104844 | 0.320357  | 0.234786  |
| 4 | 6 | 0 | -9.447934 | -0.587846 | -0.060725 |

|    |    |   |            |           |           |
|----|----|---|------------|-----------|-----------|
| 5  | 6  | 0 | -9.375877  | 0.787785  | 0.019380  |
| 6  | 6  | 0 | -10.522868 | 1.569852  | -0.119528 |
| 7  | 6  | 0 | -11.744998 | 0.925776  | -0.400467 |
| 8  | 1  | 0 | -12.637756 | 1.504344  | -0.511848 |
| 9  | 6  | 0 | -11.796342 | -0.482408 | -0.539367 |
| 10 | 1  | 0 | -12.722933 | -0.962149 | -0.773200 |
| 11 | 6  | 0 | -10.631281 | -1.252907 | -0.367706 |
| 12 | 1  | 0 | -10.654594 | -2.317906 | -0.466138 |
| 13 | 1  | 0 | -10.475097 | 2.634115  | -0.019772 |
| 14 | 6  | 0 | -5.044955  | 1.838092  | 0.163690  |
| 15 | 7  | 0 | -4.615111  | 2.899551  | 0.138193  |
| 16 | 7  | 0 | -7.993839  | 1.299114  | 0.240317  |
| 17 | 16 | 0 | -7.872939  | -1.284790 | 0.273543  |
| 18 | 6  | 0 | -2.089355  | -1.463213 | 0.130351  |
| 19 | 6  | 0 | -2.538045  | 0.850402  | 0.093204  |
| 20 | 1  | 0 | -2.294430  | -2.524739 | 0.141029  |
| 21 | 6  | 0 | -1.054009  | 0.561796  | 0.061595  |
| 22 | 1  | 0 | -2.986249  | 1.810569  | 0.083598  |
| 23 | 1  | 0 | -5.143980  | -1.515703 | 0.221115  |
| 24 | 6  | 0 | -0.017719  | 1.458594  | 0.009693  |
| 25 | 6  | 0 | 1.376617   | 0.822686  | -0.251390 |
| 26 | 6  | 0 | 2.570441   | 1.431336  | -0.165214 |
| 27 | 6  | 0 | 3.656471   | 0.367295  | -0.284434 |
| 28 | 6  | 0 | 3.015856   | -0.837924 | -0.381518 |
| 29 | 6  | 0 | -3.179417  | -0.337332 | 0.136023  |
| 30 | 7  | 0 | -0.891647  | -0.902503 | 0.105485  |
| 31 | 7  | 0 | 1.561247   | -0.602333 | -0.639169 |
| 32 | 5  | 0 | 0.565216   | -1.554328 | 0.166230  |

|    |   |   |           |           |           |
|----|---|---|-----------|-----------|-----------|
| 33 | 9 | 0 | 0.980678  | -1.661116 | 1.557628  |
| 34 | 9 | 0 | 0.581334  | -2.916608 | -0.423567 |
| 35 | 1 | 0 | 2.718282  | 2.477079  | -0.058470 |
| 36 | 1 | 0 | 3.505621  | -1.796568 | -0.326465 |
| 37 | 6 | 0 | 5.201265  | 0.607578  | -0.206784 |
| 38 | 6 | 0 | 6.075204  | -0.430789 | -0.283035 |
| 39 | 6 | 0 | 7.617838  | -0.203599 | -0.220572 |
| 40 | 6 | 0 | 8.146262  | 1.084567  | -0.115365 |
| 41 | 6 | 0 | 8.498731  | -1.291733 | -0.280609 |
| 42 | 6 | 0 | 9.542788  | 1.281259  | 0.036412  |
| 43 | 1 | 0 | 7.485254  | 1.929527  | -0.158121 |
| 44 | 6 | 0 | 9.895588  | -1.100443 | -0.132809 |
| 45 | 1 | 0 | 8.107911  | -2.275296 | -0.447245 |
| 46 | 6 | 0 | 10.422442 | 0.177285  | 0.147941  |
| 47 | 1 | 0 | 9.926595  | 2.283266  | 0.064286  |
| 48 | 1 | 0 | 10.551535 | -1.944272 | -0.235273 |
| 49 | 7 | 0 | 11.875238 | 0.355811  | 0.535975  |
| 50 | 6 | 0 | 12.318074 | 1.716300  | 0.146313  |
| 51 | 1 | 0 | 13.388162 | 1.796034  | 0.245426  |
| 52 | 1 | 0 | 12.026730 | 1.858283  | -0.865227 |
| 53 | 1 | 0 | 11.868840 | 2.481792  | 0.769289  |
| 54 | 6 | 0 | 12.687102 | -0.677704 | -0.155433 |
| 55 | 1 | 0 | 12.531536 | -1.667354 | 0.260942  |
| 56 | 1 | 0 | 12.391541 | -0.670101 | -1.177987 |
| 57 | 1 | 0 | 13.734014 | -0.441635 | -0.065232 |
| 58 | 1 | 0 | -0.164102 | 2.524307  | 0.134364  |
| 59 | 1 | 0 | 5.583837  | 1.609076  | -0.103987 |
| 60 | 1 | 0 | 5.683646  | -1.420748 | -0.392295 |

**B2**

Center Atomic Atomic Coordinates (Angstroms)

Number Number Type X Y Z

---

|    |   |   |           |           |           |
|----|---|---|-----------|-----------|-----------|
| 1  | 6 | 0 | -1.165069 | -2.646188 | -0.775007 |
| 2  | 6 | 0 | -3.000872 | -1.200329 | -0.467048 |
| 3  | 1 | 0 | -0.636782 | -3.570320 | -0.964483 |
| 4  | 6 | 0 | -1.682482 | -0.463208 | -0.395255 |
| 5  | 6 | 0 | -1.471085 | 0.876071  | -0.189145 |
| 6  | 6 | 0 | -0.004440 | 1.341764  | -0.410047 |
| 7  | 6 | 0 | 0.517416  | 2.539807  | -0.101084 |
| 8  | 6 | 0 | 2.029179  | 2.462191  | -0.286571 |
| 9  | 6 | 0 | 2.314146  | 1.174244  | -0.650376 |
| 10 | 6 | 0 | -2.723359 | -2.502949 | -0.690823 |
| 11 | 7 | 0 | -0.612822 | -1.459798 | -0.582596 |
| 12 | 7 | 0 | 1.043322  | 0.472651  | -1.011691 |
| 13 | 5 | 0 | 0.921953  | -1.028733 | -0.484288 |
| 14 | 9 | 0 | 1.351821  | -1.114226 | 0.904202  |
| 15 | 9 | 0 | 1.794223  | -1.919197 | -1.290603 |
| 16 | 1 | 0 | -0.040708 | 3.392836  | 0.195007  |
| 17 | 1 | 0 | -2.266204 | 1.552922  | 0.097863  |
| 18 | 6 | 0 | 3.707629  | 0.526519  | -0.751647 |
| 19 | 6 | 0 | 7.614690  | -0.918480 | 0.487788  |
| 20 | 6 | 0 | 8.267316  | 0.359352  | 0.496758  |
| 21 | 6 | 0 | 9.739760  | 0.630302  | 0.857444  |
| 22 | 6 | 0 | 10.576670 | -0.433236 | 1.221301  |

|    |    |   |            |           |           |
|----|----|---|------------|-----------|-----------|
| 23 | 1  | 0 | 11.599731  | -0.244978 | 1.471908  |
| 24 | 6  | 0 | 10.078254  | -1.742492 | 1.258060  |
| 25 | 1  | 0 | 10.722070  | -2.550450 | 1.536636  |
| 26 | 6  | 0 | 8.256356   | -2.274145 | 0.837124  |
| 27 | 6  | 0 | 6.108631   | 0.660553  | -0.123132 |
| 28 | 6  | 0 | 4.855477   | 1.303292  | -0.544310 |
| 29 | 1  | 0 | 3.799263   | -0.514823 | -0.979926 |
| 30 | 6  | 0 | 4.804110   | 2.827622  | -0.757337 |
| 31 | 7  | 0 | 4.765864   | 3.962555  | -0.915945 |
| 32 | 1  | 0 | 7.816354   | -3.249451 | 0.845841  |
| 33 | 1  | 0 | 10.123165  | 1.628883  | 0.830285  |
| 34 | 16 | 0 | 6.284696   | -0.701619 | 0.101793  |
| 35 | 7  | 0 | 7.314051   | 1.313996  | 0.115813  |
| 36 | 1  | 0 | 2.730627   | 3.259795  | -0.157350 |
| 37 | 1  | 0 | -3.437463  | -3.293316 | -0.792187 |
| 38 | 6  | 0 | -4.398578  | -0.572681 | -0.311889 |
| 39 | 6  | 0 | -5.540485  | -1.380122 | -0.401393 |
| 40 | 6  | 0 | -6.916702  | -0.808767 | -0.012577 |
| 41 | 6  | 0 | -7.025043  | 0.510607  | 0.427863  |
| 42 | 6  | 0 | -8.054880  | -1.610210 | -0.100825 |
| 43 | 6  | 0 | -8.271225  | 1.028130  | 0.780597  |
| 44 | 1  | 0 | -6.127427  | 1.141955  | 0.498058  |
| 45 | 6  | 0 | -9.301657  | -1.092378 | 0.251039  |
| 46 | 1  | 0 | -7.969696  | -2.650049 | -0.448110 |
| 47 | 6  | 0 | -9.409981  | 0.226524  | 0.691833  |
| 48 | 1  | 0 | -8.356610  | 2.067873  | 1.128362  |
| 49 | 1  | 0 | -10.198945 | -1.724389 | 0.180967  |
| 50 | 7  | 0 | -10.723302 | 0.772301  | 1.063607  |

|    |   |   |            |           |           |
|----|---|---|------------|-----------|-----------|
| 51 | 6 | 0 | -10.729276 | 2.226063  | 0.845797  |
| 52 | 1 | 0 | -10.085021 | 2.696229  | 1.559084  |
| 53 | 1 | 0 | -10.382347 | 2.439910  | -0.143551 |
| 54 | 1 | 0 | -11.724811 | 2.600230  | 0.963316  |
| 55 | 6 | 0 | -11.765418 | 0.148476  | 0.235513  |
| 56 | 1 | 0 | -11.853534 | -0.886375 | 0.492844  |
| 57 | 1 | 0 | -12.700064 | 0.639839  | 0.408424  |
| 58 | 1 | 0 | -11.501200 | 0.237888  | -0.797490 |
| 59 | 1 | 0 | -5.456297  | -2.391868 | -0.739304 |
| 60 | 1 | 0 | -4.497672  | 0.478109  | -0.136048 |

### B3

| Center | Atomic | Atomic | Coordinates (Angstroms) |   |   |
|--------|--------|--------|-------------------------|---|---|
| Number | Number | Type   | X                       | Y | Z |

-----

|    |   |   |           |           |           |
|----|---|---|-----------|-----------|-----------|
| 1  | 6 | 0 | -2.648153 | 1.388620  | -0.020723 |
| 2  | 6 | 0 | -0.997929 | 3.072762  | -0.190615 |
| 3  | 6 | 0 | -0.403018 | 1.669988  | -0.154591 |
| 4  | 6 | 0 | 0.897499  | 1.293105  | -0.217235 |
| 5  | 6 | 0 | 1.164131  | -0.212417 | -0.401908 |
| 6  | 6 | 0 | 2.334856  | -0.839690 | -0.344077 |
| 7  | 6 | 0 | 2.055083  | -2.342265 | -0.338913 |
| 8  | 6 | 0 | 0.707596  | -2.483640 | -0.396055 |
| 9  | 6 | 0 | -2.338433 | 2.910831  | -0.107967 |
| 10 | 7 | 0 | -1.511179 | 0.721882  | -0.022743 |
| 11 | 7 | 0 | 0.084640  | -1.163822 | -0.694534 |
| 12 | 5 | 0 | -1.237296 | -0.840776 | 0.118465  |
| 13 | 9 | 0 | -1.045065 | -1.159557 | 1.530647  |



|    |    |   |           |           |           |
|----|----|---|-----------|-----------|-----------|
| 14 | 9  | 0 | -2.348825 | -1.630270 | -0.402719 |
| 15 | 1  | 0 | 1.692361  | 2.005519  | -0.146996 |
| 16 | 1  | 0 | 2.779920  | -3.129847 | -0.288468 |
| 17 | 1  | 0 | -3.062860 | 3.697623  | -0.102498 |
| 18 | 1  | 0 | 0.179518  | -3.401642 | -0.246258 |
| 19 | 6  | 0 | 3.686683  | -0.167129 | -0.261684 |
| 20 | 6  | 0 | 4.758676  | -0.909061 | -0.155832 |
| 21 | 6  | 0 | 7.870591  | 1.209141  | -0.060276 |
| 22 | 6  | 0 | 8.522480  | 0.048915  | 0.147430  |
| 23 | 6  | 0 | 6.106933  | -0.260054 | -0.072227 |
| 24 | 1  | 0 | 3.799353  | 0.884197  | -0.272741 |
| 25 | 6  | 0 | 4.725662  | -2.448616 | -0.059885 |
| 26 | 7  | 0 | 4.700706  | -3.609201 | 0.012439  |
| 27 | 6  | 0 | 8.664445  | 2.513722  | -0.140174 |
| 28 | 6  | 0 | 10.036399 | 2.412602  | 0.009992  |
| 29 | 6  | 0 | 9.987048  | -0.075121 | 0.292716  |
| 30 | 6  | 0 | 10.725384 | 1.047577  | 0.239014  |
| 31 | 7  | 0 | 6.393187  | 1.051301  | -0.189335 |
| 32 | 16 | 0 | 7.489148  | -1.359086 | 0.264279  |
| 33 | 1  | 0 | 8.153968  | 3.455135  | -0.305828 |
| 34 | 1  | 0 | 10.612584 | 3.292215  | -0.035353 |
| 35 | 1  | 0 | 11.769803 | 0.946376  | 0.362407  |
| 36 | 1  | 0 | 10.376897 | -1.060552 | 0.445843  |
| 37 | 1  | 0 | -0.463900 | 3.997409  | -0.264815 |
| 38 | 6  | 0 | -4.072962 | 0.790921  | 0.063196  |
| 39 | 6  | 0 | -5.161630 | 1.608849  | 0.093991  |
| 40 | 6  | 0 | -6.585605 | 1.012663  | 0.164056  |
| 41 | 6  | 0 | -6.756708 | -0.375940 | 0.191815  |

|    |   |   |            |           |           |
|----|---|---|------------|-----------|-----------|
| 42 | 6 | 0 | -7.711069  | 1.856583  | 0.198821  |
| 43 | 6 | 0 | -8.046040  | -0.926431 | 0.256019  |
| 44 | 1 | 0 | -5.903198  | -1.015875 | 0.161883  |
| 45 | 6 | 0 | -9.002644  | 1.305489  | 0.261938  |
| 46 | 1 | 0 | -7.586912  | 2.918986  | 0.175545  |
| 47 | 6 | 0 | -9.171967  | -0.087724 | 0.290545  |
| 48 | 1 | 0 | -8.169497  | -1.986282 | 0.273582  |
| 49 | 1 | 0 | -9.856544  | 1.947797  | 0.284684  |
| 50 | 7 | 0 | -10.525976 | -0.671142 | 0.339321  |
| 51 | 6 | 0 | -11.452815 | 0.216175  | -0.371471 |
| 52 | 1 | 0 | -12.411432 | -0.253985 | -0.435005 |
| 53 | 1 | 0 | -11.541352 | 1.139868  | 0.161725  |
| 54 | 1 | 0 | -11.082505 | 0.408081  | -1.356477 |
| 55 | 6 | 0 | -10.501303 | -1.989907 | -0.300304 |
| 56 | 1 | 0 | -10.086336 | -1.906521 | -1.282070 |
| 57 | 1 | 0 | -9.901892  | -2.656893 | 0.284357  |
| 58 | 1 | 0 | -11.499483 | -2.368521 | -0.364522 |
| 59 | 1 | 0 | -5.035883  | 2.669607  | 0.073623  |
| 60 | 1 | 0 | -4.206289  | -0.267800 | 0.095646  |

#### B4

| Center | Atomic | Atomic | Coordinates (Angstroms) |   |   |
|--------|--------|--------|-------------------------|---|---|
| Number | Number | Type   | X                       | Y | Z |

-----

|   |   |   |           |           |           |
|---|---|---|-----------|-----------|-----------|
| 1 | 6 | 0 | -1.836799 | -5.082847 | 0.110952  |
| 2 | 6 | 0 | -2.430711 | -2.804797 | -0.103980 |
| 3 | 6 | 0 | -0.921838 | -3.016679 | -0.066578 |
| 4 | 6 | 0 | 0.070939  | -2.097559 | -0.149779 |

|    |    |   |           |           |           |
|----|----|---|-----------|-----------|-----------|
| 5  | 6  | 0 | 1.498370  | -2.648146 | -0.326099 |
| 6  | 6  | 0 | 2.639149  | -1.966762 | -0.284271 |
| 7  | 6  | 0 | 3.782986  | -2.980229 | -0.260787 |
| 8  | 6  | 0 | 3.210008  | -4.208927 | -0.291937 |
| 9  | 6  | 0 | -2.982201 | -4.035266 | 0.004683  |
| 10 | 7  | 0 | -0.679692 | -4.451922 | 0.093907  |
| 11 | 7  | 0 | 1.757288  | -4.069117 | -0.590497 |
| 12 | 5  | 0 | 0.801078  | -5.019118 | 0.243769  |
| 13 | 9  | 0 | 1.176066  | -4.989950 | 1.654926  |
| 14 | 9  | 0 | 0.904269  | -6.388791 | -0.249973 |
| 15 | 1  | 0 | -0.130162 | -1.048087 | -0.100399 |
| 16 | 1  | 0 | 4.831497  | -2.763657 | -0.216750 |
| 17 | 1  | 0 | -4.029716 | -4.250761 | 0.016548  |
| 18 | 1  | 0 | 3.725166  | -5.131199 | -0.124421 |
| 19 | 6  | 0 | 2.759105  | -0.460273 | -0.232615 |
| 20 | 6  | 0 | 3.947404  | 0.078427  | -0.139956 |
| 21 | 6  | 0 | 3.734821  | 3.837994  | -0.120141 |
| 22 | 6  | 0 | 5.065476  | 3.803328  | 0.085734  |
| 23 | 6  | 0 | 4.085714  | 1.569750  | -0.086817 |
| 24 | 1  | 0 | 1.915975  | 0.177484  | -0.254963 |
| 25 | 6  | 0 | 5.250212  | -0.740786 | -0.029915 |
| 26 | 7  | 0 | 6.232290  | -1.358403 | 0.053035  |
| 27 | 6  | 0 | 3.025336  | 5.188524  | -0.226043 |
| 28 | 6  | 0 | 3.818950  | 6.315191  | -0.100211 |
| 29 | 6  | 0 | 5.926424  | 4.997459  | 0.205190  |
| 30 | 6  | 0 | 5.344295  | 6.207275  | 0.128092  |
| 31 | 7  | 0 | 3.108901  | 2.488026  | -0.220663 |
| 32 | 16 | 0 | 5.740331  | 2.195062  | 0.233885  |

|    |   |   |           |           |           |
|----|---|---|-----------|-----------|-----------|
| 33 | 1 | 0 | 1.955156  | 5.232538  | -0.390551 |
| 34 | 1 | 0 | 3.361677  | 7.261033  | -0.163842 |
| 35 | 1 | 0 | 5.969223  | 7.052675  | 0.233172  |
| 36 | 1 | 0 | 6.972179  | 4.827150  | 0.359774  |
| 37 | 1 | 0 | -1.967112 | -6.142251 | 0.185656  |
| 38 | 6 | 0 | -3.175479 | -1.463395 | -0.236494 |
| 39 | 6 | 0 | -4.576606 | -1.441291 | -0.253178 |
| 40 | 6 | 0 | -5.324186 | -0.099005 | -0.148339 |
| 41 | 6 | 0 | -4.606553 | 1.092244  | -0.036988 |
| 42 | 6 | 0 | -6.718696 | -0.074139 | -0.164811 |
| 43 | 6 | 0 | -5.283369 | 2.307981  | 0.058544  |
| 44 | 1 | 0 | -3.507165 | 1.072236  | -0.023256 |
| 45 | 6 | 0 | -7.395857 | 1.141970  | -0.070252 |
| 46 | 1 | 0 | -7.284458 | -1.012920 | -0.252747 |
| 47 | 6 | 0 | -6.678469 | 2.332932  | 0.041553  |
| 48 | 1 | 0 | -4.717799 | 3.246923  | 0.146947  |
| 49 | 1 | 0 | -8.495366 | 1.161303  | -0.083680 |
| 50 | 7 | 0 | -7.391527 | 3.614463  | 0.142180  |
| 51 | 6 | 0 | -8.859274 | 3.646751  | 0.067493  |
| 52 | 1 | 0 | -9.270016 | 3.071391  | 0.870706  |
| 53 | 1 | 0 | -9.198120 | 4.658791  | 0.144030  |
| 54 | 1 | 0 | -9.178044 | 3.233572  | -0.866621 |
| 55 | 6 | 0 | -6.636839 | 4.863707  | 0.317495  |
| 56 | 1 | 0 | -6.046485 | 4.801823  | 1.207750  |
| 57 | 1 | 0 | -5.995758 | 5.014462  | -0.525824 |
| 58 | 1 | 0 | -7.318943 | 5.684150  | 0.398171  |
| 59 | 1 | 0 | -2.624102 | -0.549824 | -0.315690 |
| 60 | 1 | 0 | -5.126032 | -2.355475 | -0.338614 |

**B5**

Center Atomic Atomic Coordinates (Angstroms)

Number Number Type X Y Z

-----

|    |    |   |           |           |           |
|----|----|---|-----------|-----------|-----------|
| 1  | 6  | 0 | 4.006057  | 0.840019  | 0.173671  |
| 2  | 6  | 0 | 4.309421  | -0.499131 | 0.174893  |
| 3  | 6  | 0 | 5.787643  | -0.961020 | 0.235890  |
| 4  | 6  | 0 | 8.298056  | -1.146395 | -0.020408 |
| 5  | 6  | 0 | 7.640635  | -2.357942 | 0.042216  |
| 6  | 6  | 0 | 8.342375  | -3.556265 | -0.092302 |
| 7  | 6  | 0 | 9.727018  | -3.498405 | -0.350712 |
| 8  | 1  | 0 | 10.286226 | -4.403873 | -0.458312 |
| 9  | 6  | 0 | 10.380672 | -2.248227 | -0.471979 |
| 10 | 1  | 0 | 11.427124 | -2.211989 | -0.688832 |
| 11 | 6  | 0 | 9.657120  | -1.052770 | -0.305070 |
| 12 | 1  | 0 | 10.137356 | -0.100638 | -0.390353 |
| 13 | 1  | 0 | 7.840352  | -4.497228 | -0.005980 |
| 14 | 6  | 0 | 3.276898  | -1.445615 | 0.121687  |
| 15 | 7  | 0 | 2.433140  | -2.219111 | 0.078207  |
| 16 | 7  | 0 | 6.169621  | -2.226872 | 0.240311  |
| 17 | 16 | 0 | 7.170184  | 0.157911  | 0.303261  |
| 18 | 6  | 0 | 2.027504  | 2.805674  | 0.092612  |
| 19 | 6  | 0 | 1.439083  | 0.524070  | 0.032949  |
| 20 | 1  | 0 | 2.668597  | 3.675923  | 0.118569  |
| 21 | 6  | 0 | 0.223753  | 1.422688  | -0.013039 |
| 22 | 1  | 0 | 1.431329  | -0.535453 | 0.017152  |
| 23 | 1  | 0 | 4.806435  | 1.539639  | 0.220772  |

|    |   |   |           |           |           |
|----|---|---|-----------|-----------|-----------|
| 24 | 6 | 0 | -1.096352 | 1.058674  | -0.088234 |
| 25 | 6 | 0 | -2.077783 | 2.233630  | -0.358391 |
| 26 | 6 | 0 | -3.418522 | 2.196705  | -0.293947 |
| 27 | 6 | 0 | -3.939922 | 3.624898  | -0.413383 |
| 28 | 6 | 0 | -2.842132 | 4.438303  | -0.488194 |
| 29 | 6 | 0 | 2.527796  | 1.320563  | 0.097818  |
| 30 | 7 | 0 | 0.705640  | 2.814339  | 0.046562  |
| 31 | 7 | 0 | -1.625946 | 3.601856  | -0.731138 |
| 32 | 5 | 0 | -0.330572 | 4.028700  | 0.097625  |
| 33 | 9 | 0 | -0.682125 | 4.295725  | 1.485108  |
| 34 | 9 | 0 | 0.249690  | 5.269007  | -0.475839 |
| 35 | 1 | 0 | -2.873287 | 5.514055  | -0.427476 |
| 36 | 1 | 0 | -1.424108 | 0.032810  | 0.025320  |
| 37 | 1 | 0 | -4.964895 | 3.931297  | -0.434562 |
| 38 | 6 | 0 | -4.266519 | 0.918205  | -0.160003 |
| 39 | 6 | 0 | -5.663737 | 1.009846  | -0.102504 |
| 40 | 6 | 0 | -6.511733 | -0.268653 | 0.031440  |
| 41 | 6 | 0 | -5.888748 | -1.515361 | 0.095326  |
| 42 | 6 | 0 | -7.902570 | -0.180287 | 0.089000  |
| 43 | 6 | 0 | -6.656537 | -2.673438 | 0.216066  |
| 44 | 1 | 0 | -4.792256 | -1.584746 | 0.049147  |
| 45 | 6 | 0 | -8.670692 | -1.338549 | 0.210768  |
| 46 | 1 | 0 | -8.393735 | 0.802246  | 0.038841  |
| 47 | 6 | 0 | -8.047948 | -2.585027 | 0.274168  |
| 48 | 1 | 0 | -6.165594 | -3.656189 | 0.265796  |
| 49 | 1 | 0 | -9.767267 | -1.268539 | 0.256542  |
| 50 | 7 | 0 | -8.856901 | -3.805798 | 0.401504  |
| 51 | 6 | 0 | -8.153165 | -4.928557 | -0.234945 |

|    |   |   |            |           |           |
|----|---|---|------------|-----------|-----------|
| 52 | 1 | 0 | -7.842983  | -4.643551 | -1.218539 |
| 53 | 1 | 0 | -7.294668  | -5.188196 | 0.348554  |
| 54 | 1 | 0 | -8.809602  | -5.771173 | -0.298114 |
| 55 | 6 | 0 | -10.155204 | -3.604277 | -0.257813 |
| 56 | 1 | 0 | -10.690036 | -4.530678 | -0.283011 |
| 57 | 1 | 0 | -10.723128 | -2.879265 | 0.286907  |
| 58 | 1 | 0 | -9.997470  | -3.256204 | -1.257245 |
| 59 | 1 | 0 | -6.140534  | 1.966484  | -0.151583 |
| 60 | 1 | 0 | -3.789722  | -0.038433 | -0.110924 |

## B6

| Center | Atomic | Atomic | Coordinates (Angstroms) |   |   |
|--------|--------|--------|-------------------------|---|---|
| Number | Number | Type   | X                       | Y | Z |

-----

|   |   |   |           |           |           |
|---|---|---|-----------|-----------|-----------|
| 1 | 6 | 0 | -1.955169 | -3.631348 | 0.207206  |
| 2 | 6 | 0 | -3.028621 | -1.561968 | -0.051988 |
| 3 | 1 | 0 | -1.851519 | -4.688800 | 0.318093  |
| 4 | 6 | 0 | -1.528639 | -1.430196 | -0.037122 |
| 5 | 6 | 0 | -0.772631 | -0.312151 | -0.157769 |
| 6 | 6 | 0 | 0.744550  | -0.523905 | -0.339029 |
| 7 | 6 | 0 | 1.714862  | 0.416581  | -0.314873 |
| 8 | 6 | 0 | 3.057859  | -0.323993 | -0.297682 |
| 9 | 6 | 0 | 2.771056  | -1.661279 | -0.319485 |

|    |   |   |           |           |           |
|----|---|---|-----------|-----------|-----------|
| 10 | 6 | 0 | -3.311339 | -2.875200 | 0.093541  |
| 11 | 7 | 0 | -0.971284 | -2.760362 | 0.150933  |
| 12 | 7 | 0 | 1.313268  | -1.859988 | -0.590820 |
| 13 | 5 | 0 | 0.601507  | -2.982703 | 0.282323  |
| 14 | 9 | 0 | 0.976372  | -2.837685 | 1.686498  |
| 15 | 9 | 0 | 0.995563  | -4.306218 | -0.184235 |
| 16 | 1 | 0 | 1.570589  | 1.479843  | -0.291366 |
| 17 | 1 | 0 | 3.481125  | -2.443004 | -0.156959 |
| 18 | 6 | 0 | 4.464795  | 0.343774  | -0.251556 |
| 19 | 6 | 0 | 5.601515  | -0.414967 | -0.227214 |
| 20 | 6 | 0 | 7.015185  | 0.245198  | -0.171386 |
| 21 | 6 | 0 | 7.161132  | 1.641457  | -0.165350 |
| 22 | 6 | 0 | 8.167498  | -0.559230 | -0.111404 |
| 23 | 6 | 0 | 8.437653  | 2.227679  | 0.005037  |
| 24 | 1 | 0 | 6.299995  | 2.263448  | -0.285889 |
| 25 | 6 | 0 | 9.444443  | 0.023697  | 0.055598  |
| 26 | 1 | 0 | 8.074759  | -1.622028 | -0.187003 |
| 27 | 6 | 0 | 9.578764  | 1.419052  | 0.201602  |
| 28 | 1 | 0 | 8.537263  | 3.293131  | -0.014470 |
| 29 | 1 | 0 | 10.314195 | -0.599479 | 0.074814  |
| 30 | 7 | 0 | 10.903960 | 2.027967  | 0.554917  |
| 31 | 6 | 0 | 10.973790 | 3.405584  | 0.046419  |
| 32 | 1 | 0 | 11.964424 | 3.790106  | 0.193141  |
| 33 | 1 | 0 | 10.738893 | 3.427274  | -0.992338 |
| 34 | 1 | 0 | 10.273824 | 4.007626  | 0.585554  |
| 35 | 6 | 0 | 11.989731 | 1.219854  | -0.025416 |
| 36 | 1 | 0 | 12.025341 | 0.276940  | 0.476447  |
| 37 | 1 | 0 | 11.815673 | 1.065914  | -1.065899 |



|    |    |   |            |           |           |
|----|----|---|------------|-----------|-----------|
| 38 | 1  | 0 | 12.924393  | 1.730097  | 0.104744  |
| 39 | 1  | 0 | -1.201028  | 0.664816  | -0.128850 |
| 40 | 1  | 0 | 4.540240   | 1.411857  | -0.233472 |
| 41 | 1  | 0 | 5.517075   | -1.481822 | -0.238982 |
| 42 | 1  | 0 | -4.288809  | -3.314156 | 0.128485  |
| 43 | 6  | 0 | -4.004695  | -0.413531 | -0.193162 |
| 44 | 6  | 0 | -5.279191  | -0.687271 | -0.205386 |
| 45 | 6  | 0 | -8.417464  | 1.738814  | 0.044069  |
| 46 | 6  | 0 | -7.274457  | 2.523187  | 0.062138  |
| 47 | 1  | 0 | -3.704927  | 0.584330  | -0.266814 |
| 48 | 6  | 0 | -6.303685  | 0.420921  | -0.125967 |
| 49 | 6  | 0 | -7.398826  | 4.009661  | 0.160356  |
| 50 | 6  | 0 | -8.651239  | 4.548081  | 0.222325  |
| 51 | 1  | 0 | -8.737621  | 5.599180  | 0.277492  |
| 52 | 6  | 0 | -9.945063  | 3.640414  | 0.196651  |
| 53 | 1  | 0 | -10.909528 | 4.036911  | 0.257055  |
| 54 | 6  | 0 | -9.786717  | 2.342359  | 0.092477  |
| 55 | 6  | 0 | -5.858538  | -2.108569 | -0.263029 |
| 56 | 7  | 0 | -6.301272  | -3.194580 | -0.307073 |
| 57 | 7  | 0 | -6.006835  | 1.747148  | -0.039152 |
| 58 | 16 | 0 | -8.077371  | -0.018950 | -0.054428 |
| 59 | 1  | 0 | -6.524053  | 4.653636  | 0.172117  |
| 60 | 1  | 0 | -10.581548 | 1.678510  | 0.053729  |

## B7

| Center | Atomic | Atomic | Coordinates (Angstroms) |   |   |
|--------|--------|--------|-------------------------|---|---|
| Number | Number | Type   | X                       | Y | Z |

-----

|    |   |   |           |           |           |
|----|---|---|-----------|-----------|-----------|
| 1  | 6 | 0 | 2.937111  | -2.073359 | 0.042212  |
| 2  | 6 | 0 | 2.438689  | -4.373527 | 0.037638  |
| 3  | 6 | 0 | 1.187342  | -3.500722 | 0.013428  |
| 4  | 1 | 0 | 2.482299  | -5.439665 | 0.034933  |
| 5  | 6 | 0 | -0.112032 | -3.876934 | -0.011583 |
| 6  | 6 | 0 | -1.152349 | -2.769533 | -0.263911 |
| 7  | 6 | 0 | -2.495660 | -2.866187 | -0.169983 |
| 8  | 6 | 0 | -3.056886 | -1.443040 | -0.271088 |
| 9  | 6 | 0 | -1.984109 | -0.606707 | -0.417520 |
| 10 | 6 | 0 | 3.484949  | -3.522096 | 0.045218  |
| 11 | 7 | 0 | 1.620578  | -2.106236 | 0.048750  |
| 12 | 7 | 0 | -0.749626 | -1.411486 | -0.670908 |
| 13 | 5 | 0 | 0.552550  | -0.922394 | 0.107634  |
| 14 | 9 | 0 | 0.229008  | -0.656905 | 1.505492  |
| 15 | 9 | 0 | 1.068688  | 0.301196  | -0.505663 |
| 16 | 1 | 0 | -3.058954 | -3.765949 | -0.034881 |
| 17 | 1 | 0 | -2.023785 | 0.459506  | -0.359345 |
| 18 | 6 | 0 | -4.562801 | -1.053367 | -0.199431 |
| 19 | 6 | 0 | -4.958929 | 0.252014  | -0.282399 |
| 20 | 6 | 0 | -6.465383 | 0.649752  | -0.188978 |
| 21 | 6 | 0 | -7.466128 | -0.327689 | -0.045784 |
| 22 | 6 | 0 | -6.840445 | 2.005356  | -0.251257 |
| 23 | 6 | 0 | -8.811935 | 0.053399  | 0.157265  |
| 24 | 1 | 0 | -7.204569 | -1.364100 | -0.077647 |
| 25 | 6 | 0 | -8.185036 | 2.386889  | -0.051929 |
| 26 | 1 | 0 | -6.098032 | 2.752455  | -0.436737 |
| 27 | 6 | 0 | -9.165656 | 1.415899  | 0.223597  |
| 28 | 1 | 0 | -9.565832 | -0.697171 | 0.263122  |

|    |   |   |            |           |           |
|----|---|---|------------|-----------|-----------|
| 29 | 1 | 0 | -8.458040  | 3.419546  | -0.105943 |
| 30 | 7 | 0 | -10.555516 | 1.824684  | 0.582335  |
| 31 | 6 | 0 | -11.505909 | 0.766771  | 0.219525  |
| 32 | 1 | 0 | -12.504967 | 1.109837  | 0.403151  |
| 33 | 1 | 0 | -11.400570 | 0.522265  | -0.817188 |
| 34 | 1 | 0 | -11.310869 | -0.100977 | 0.812881  |
| 35 | 6 | 0 | -10.903685 | 3.076954  | -0.102295 |
| 36 | 1 | 0 | -10.288242 | 3.867348  | 0.270526  |
| 37 | 1 | 0 | -10.747882 | 2.969435  | -1.156557 |
| 38 | 1 | 0 | -11.934545 | 3.307615  | 0.081526  |
| 39 | 1 | 0 | -0.398082  | -4.894628 | 0.128145  |
| 40 | 1 | 0 | -5.298309  | -1.821157 | -0.073372 |
| 41 | 1 | 0 | -4.220795  | 1.015106  | -0.412071 |
| 42 | 1 | 0 | 4.516699   | -3.794619 | 0.056481  |
| 43 | 6 | 0 | 3.863708   | -0.848535 | 0.040816  |
| 44 | 6 | 0 | 5.233486   | -1.017589 | 0.040246  |
| 45 | 6 | 0 | 6.671138   | 2.622619  | 0.008662  |
| 46 | 6 | 0 | 7.743187   | 1.859597  | 0.016526  |
| 47 | 6 | 0 | 6.699377   | 4.078060  | 0.004196  |
| 48 | 6 | 0 | 7.861827   | 4.705260  | -0.005416 |
| 49 | 1 | 0 | 7.879122   | 5.787060  | -0.020751 |
| 50 | 6 | 0 | 9.177791   | 3.884169  | 0.002474  |
| 51 | 1 | 0 | 10.140342  | 4.401719  | 0.001810  |
| 52 | 6 | 0 | 9.137450   | 2.545622  | 0.016674  |
| 53 | 1 | 0 | 5.762689   | 4.627203  | -0.005000 |
| 54 | 1 | 0 | 10.062639  | 1.992312  | 0.025773  |
| 55 | 1 | 0 | 3.445025   | 0.130621  | 0.030415  |
| 56 | 6 | 0 | 6.063982   | 0.221593  | 0.011778  |

|    |    |   |          |           |           |
|----|----|---|----------|-----------|-----------|
| 57 | 16 | 0 | 5.184124 | 1.719736  | -0.034126 |
| 58 | 7  | 0 | 7.380870 | 0.377524  | 0.008257  |
| 59 | 6  | 0 | 5.884531 | -2.393929 | 0.061302  |
| 60 | 7  | 0 | 6.379538 | -3.440290 | 0.077310  |

## B8

| Center<br>Number | Atomic<br>Number | Atomic<br>Type | Coordinates (Angstroms) |           |           |
|------------------|------------------|----------------|-------------------------|-----------|-----------|
|                  |                  |                | X                       | Y         | Z         |
| -----            |                  |                |                         |           |           |
| 1                | 6                | 0              | -3.953531               | -0.307317 | 0.060068  |
| 2                | 6                | 0              | -5.101478               | 0.398998  | 0.322162  |
| 3                | 6                | 0              | -6.474946               | -0.319127 | 0.313030  |
| 4                | 6                | 0              | -8.417417               | -1.862705 | -0.183359 |
| 5                | 6                | 0              | -8.785246               | -0.595646 | 0.220664  |
| 6                | 6                | 0              | -10.130062              | -0.228082 | 0.274306  |
| 7                | 6                | 0              | -11.098739              | -1.161091 | -0.148209 |
| 8                | 1                | 0              | -12.136044              | -0.901912 | -0.116781 |
| 9                | 6                | 0              | -10.705671              | -2.438013 | -0.617126 |
| 10               | 1                | 0              | -11.444548              | -3.132886 | -0.955668 |
| 11               | 6                | 0              | -9.344870               | -2.796285 | -0.636252 |
| 12               | 1                | 0              | -9.032419               | -3.758340 | -0.984503 |
| 13               | 1                | 0              | -10.419095              | 0.741114  | 0.623604  |
| 14               | 6                | 0              | -5.025362               | 1.771051  | 0.598649  |

|    |    |   |           |           |           |
|----|----|---|-----------|-----------|-----------|
| 15 | 7  | 0 | -4.963194 | 2.892297  | 0.824599  |
| 16 | 7  | 0 | -7.627892 | 0.282080  | 0.552974  |
| 17 | 16 | 0 | -6.680341 | -2.053883 | -0.028149 |
| 18 | 6  | 0 | -1.178227 | -0.267758 | -0.224823 |
| 19 | 6  | 0 | -2.348434 | 1.712618  | 0.289223  |
| 20 | 1  | 0 | -1.029522 | -1.311231 | -0.465777 |
| 21 | 6  | 0 | -0.858131 | 1.947189  | 0.186130  |
| 22 | 1  | 0 | -3.080779 | 2.446318  | 0.508891  |
| 23 | 1  | 0 | -4.035788 | -1.348985 | -0.141058 |
| 24 | 6  | 0 | -0.173027 | 3.124468  | 0.345763  |
| 25 | 6  | 0 | 1.325710  | 3.062099  | -0.062419 |
| 26 | 6  | 0 | 2.263280  | 3.996681  | 0.162565  |
| 27 | 6  | 0 | 3.620315  | 3.407981  | -0.208576 |
| 28 | 6  | 0 | 3.395584  | 2.112398  | -0.587161 |
| 29 | 6  | 0 | -2.568156 | 0.401613  | 0.050696  |
| 30 | 7  | 0 | -0.230583 | 0.648928  | -0.119095 |
| 31 | 7  | 0 | 1.926632  | 1.903491  | -0.777722 |
| 32 | 5  | 0 | 1.358359  | 0.520933  | -0.218582 |
| 33 | 9  | 0 | 1.897478  | 0.250524  | 1.106647  |
| 34 | 9  | 0 | 1.763749  | -0.590988 | -1.114804 |
| 35 | 1  | 0 | 2.075176  | 4.980522  | 0.513994  |
| 36 | 1  | 0 | -0.643675 | 4.025058  | 0.720120  |
| 37 | 1  | 0 | 4.564567  | 3.910374  | -0.178731 |
| 38 | 6  | 0 | 4.502458  | 1.071376  | -0.837562 |
| 39 | 6  | 0 | 5.847722  | 1.430596  | -0.678982 |
| 40 | 6  | 0 | 6.901715  | 0.347086  | -0.384523 |
| 41 | 6  | 0 | 6.516585  | -0.989471 | -0.276072 |
| 42 | 6  | 0 | 8.241366  | 0.701858  | -0.226351 |

|    |   |   |           |           |           |
|----|---|---|-----------|-----------|-----------|
| 43 | 6 | 0 | 7.470857  | -1.970884 | -0.008839 |
| 44 | 1 | 0 | 5.460235  | -1.268746 | -0.400062 |
| 45 | 6 | 0 | 9.196202  | -0.279855 | 0.039991  |
| 46 | 1 | 0 | 8.545110  | 1.755204  | -0.311971 |
| 47 | 6 | 0 | 8.811167  | -1.616053 | 0.148899  |
| 48 | 1 | 0 | 7.167275  | -3.024316 | 0.077279  |
| 49 | 1 | 0 | 10.252447 | 0.000112  | 0.164247  |
| 50 | 7 | 0 | 9.816725  | -2.650687 | 0.430474  |
| 51 | 6 | 0 | 11.247654 | -2.338659 | 0.304055  |
| 52 | 1 | 0 | 11.516326 | -1.597397 | 1.027412  |
| 53 | 1 | 0 | 11.822277 | -3.225534 | 0.471866  |
| 54 | 1 | 0 | 11.445918 | -1.965922 | -0.679133 |
| 55 | 6 | 0 | 9.391355  | -3.997350 | 0.838467  |
| 56 | 1 | 0 | 8.739044  | -3.924617 | 1.683512  |
| 57 | 1 | 0 | 8.874790  | -4.468852 | 0.028686  |
| 58 | 1 | 0 | 10.250609 | -4.578806 | 1.100179  |
| 59 | 1 | 0 | 6.142037  | 2.455939  | -0.762353 |
| 60 | 1 | 0 | 4.244824  | 0.075503  | -1.132115 |

## B9

| Center | Atomic | Atomic | Coordinates (Angstroms) |           |          |
|--------|--------|--------|-------------------------|-----------|----------|
| Number | Number | Type   | X                       | Y         | Z        |
| -----  |        |        |                         |           |          |
| 1      | 6      | 0      | 2.437625                | -2.904679 | 0.304608 |
| 2      | 6      | 0      | 2.279768                | -5.232844 | 0.690642 |
| 3      | 6      | 0      | 0.919893                | -4.575247 | 0.492762 |
| 4      | 1      | 0      | 2.473779                | -6.269329 | 0.881469 |

|    |   |   |           |           |           |
|----|---|---|-----------|-----------|-----------|
| 5  | 6 | 0 | -0.308360 | -5.143994 | 0.501220  |
| 6  | 6 | 0 | -1.478063 | -4.268782 | 0.026218  |
| 7  | 6 | 0 | -2.794057 | -4.553081 | 0.099485  |
| 8  | 6 | 0 | -3.538678 | -3.284884 | -0.286212 |
| 9  | 6 | 0 | -2.616207 | -2.336514 | -0.534829 |
| 10 | 6 | 0 | 3.190999  | -4.240371 | 0.574941  |
| 11 | 7 | 0 | 1.141892  | -3.143393 | 0.286857  |
| 12 | 7 | 0 | -1.257031 | -2.951872 | -0.604428 |
| 13 | 5 | 0 | -0.086001 | -2.146262 | 0.115242  |
| 14 | 9 | 0 | -0.518819 | -1.708615 | 1.439618  |
| 15 | 9 | 0 | 0.282152  | -0.976608 | -0.678645 |
| 16 | 1 | 0 | -3.233996 | -5.484991 | 0.384694  |
| 17 | 1 | 0 | -0.458136 | -6.151169 | 0.820286  |
| 18 | 1 | 0 | 4.251046  | -4.355042 | 0.655571  |
| 19 | 1 | 0 | -4.599029 | -3.154952 | -0.324418 |
| 20 | 6 | 0 | 3.132412  | -1.537554 | 0.098085  |
| 21 | 6 | 0 | 4.493021  | -1.444979 | 0.151904  |
| 22 | 6 | 0 | 5.189837  | -0.080744 | -0.062203 |
| 23 | 6 | 0 | 4.422061  | 1.062599  | -0.311456 |
| 24 | 6 | 0 | 6.589689  | 0.022524  | -0.009712 |
| 25 | 6 | 0 | 5.044576  | 2.303858  | -0.506789 |
| 26 | 1 | 0 | 3.355122  | 0.988480  | -0.351349 |
| 27 | 6 | 0 | 7.213088  | 1.265487  | -0.206738 |
| 28 | 1 | 0 | 7.183413  | -0.846850 | 0.182353  |
| 29 | 6 | 0 | 6.440538  | 2.408634  | -0.450553 |
| 30 | 1 | 0 | 4.451104  | 3.173593  | -0.698267 |
| 31 | 1 | 0 | 8.280868  | 1.340668  | -0.168550 |
| 32 | 7 | 0 | 7.092432  | 3.717409  | -0.636020 |

|    |    |   |           |           |           |
|----|----|---|-----------|-----------|-----------|
| 33 | 6  | 0 | 8.355230  | 3.737492  | 0.114404  |
| 34 | 1  | 0 | 9.023751  | 3.009449  | -0.295823 |
| 35 | 1  | 0 | 8.799465  | 4.709420  | 0.041275  |
| 36 | 1  | 0 | 8.163954  | 3.509518  | 1.140898  |
| 37 | 6  | 0 | 6.196516  | 4.772009  | -0.141000 |
| 38 | 1  | 0 | 5.309704  | 4.795298  | -0.739460 |
| 39 | 1  | 0 | 5.936584  | 4.570007  | 0.876121  |
| 40 | 1  | 0 | 6.691402  | 5.719959  | -0.201432 |
| 41 | 1  | 0 | 2.548346  | -0.662329 | -0.086672 |
| 42 | 1  | 0 | 5.079614  | -2.320739 | 0.341365  |
| 43 | 6  | 0 | -2.984180 | -0.866514 | -0.684466 |
| 44 | 6  | 0 | -4.292343 | -0.497232 | -0.662245 |
| 45 | 6  | 0 | -4.257980 | 3.306565  | 0.254639  |
| 46 | 6  | 0 | -5.547389 | 2.973504  | 0.124182  |
| 47 | 6  | 0 | -3.815657 | 4.688966  | 0.609874  |
| 48 | 6  | 0 | -4.726404 | 5.633178  | 0.830047  |
| 49 | 1  | 0 | -4.451120 | 6.614494  | 1.108675  |
| 50 | 6  | 0 | -6.622176 | 4.059202  | 0.337473  |
| 51 | 6  | 0 | -6.218756 | 5.311748  | 0.686643  |
| 52 | 1  | 0 | -6.901770 | 6.100248  | 0.859712  |
| 53 | 6  | 0 | -4.554134 | 0.952797  | -0.365063 |
| 54 | 7  | 0 | -5.723083 | 1.545987  | -0.266875 |
| 55 | 16 | 0 | -3.202401 | 1.981583  | -0.010571 |
| 56 | 1  | 0 | -2.786457 | 4.916093  | 0.687735  |
| 57 | 1  | 0 | -7.664355 | 3.851075  | 0.241336  |
| 58 | 1  | 0 | -2.229919 | -0.117630 | -0.787295 |
| 59 | 6  | 0 | -5.458586 | -1.467342 | -0.921886 |
| 60 | 7  | 0 | -6.336872 | -2.186000 | -1.114948 |
